# Supplementary material for: Breathable Iron-based MIL–88 Framework as Dyes Adsorbent in Aqueous Solution
Source: Preprints.org preprint supplement (doi:10.20944/preprints202312.1616.v1), 2023-12-21
Supplement: Supplementary file 1 [file supplementary]

ELECTRONIC SUPPORTING INFORMATION

Breathable Iron-based MIL–88 Framework as Dyes Adsorbent in Aqueous Solution

Dita A. Nurani 1,2, Nabila Anisa 1,2,†, Irena Khatrin 1,2,†, Yasmine 1,2, Grandprix T. M. Kadja 3,4,5, Yuni K. Krisnandi 1,2,*

|  |
| --- |

1 Department of Chemistry, Faculty of Mathematics and Natural Science, Universitas Indonesia, Depok 16424, Indonesia; d.arifa@sci.ui.ac.id (D.A.N); nabilaanisaa30@gmail.com (N.A.); irena.khatrin@sci.ui.ac.id (I.K.); yasaine.general@gmail.com (Y.); yuni.krisnandi@sci.ui.ac.id (Y.K.K.)

2 Solid Inorganic Framework Laboratory, Department of Chemistry, Faculty of Mathematics and Natural Science, Universitas Indonesia, Depok 16424, Indonesia

3 Division of Inorganic and Physical Chemistry, Faculty of Mathematics and Natural Sciences, Institut Teknologi Bandung, Jalan Ganesha No. 10, Bandung 40132, Indonesia

4 Center for Catalysis and Reaction Engineering, Institut Teknologi Bandung, Jalan Ganesha No. 10, Bandung 40132, Indonesia

5 Research Center for Nanosciences and Nanotechnology, Institut Teknologi Bandung, Jalan Ganesha No. 10, Bandung 40132, Indonesia

† Both students share an equal amount of work

***** Correspondence: yuni.krisnandi@sci.ui.ac.id; Tel.: +62 812-1856-7060

**S1. Rietveld refinement on the XRD pattern of MIL-88B(Fe)**

**
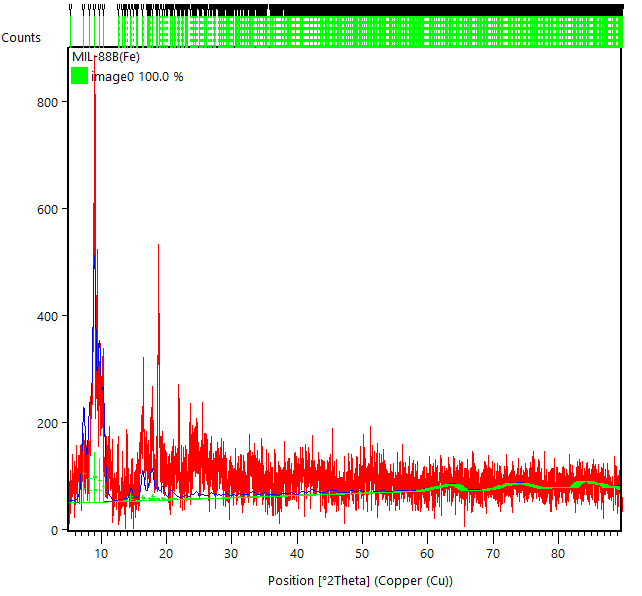
(a)**


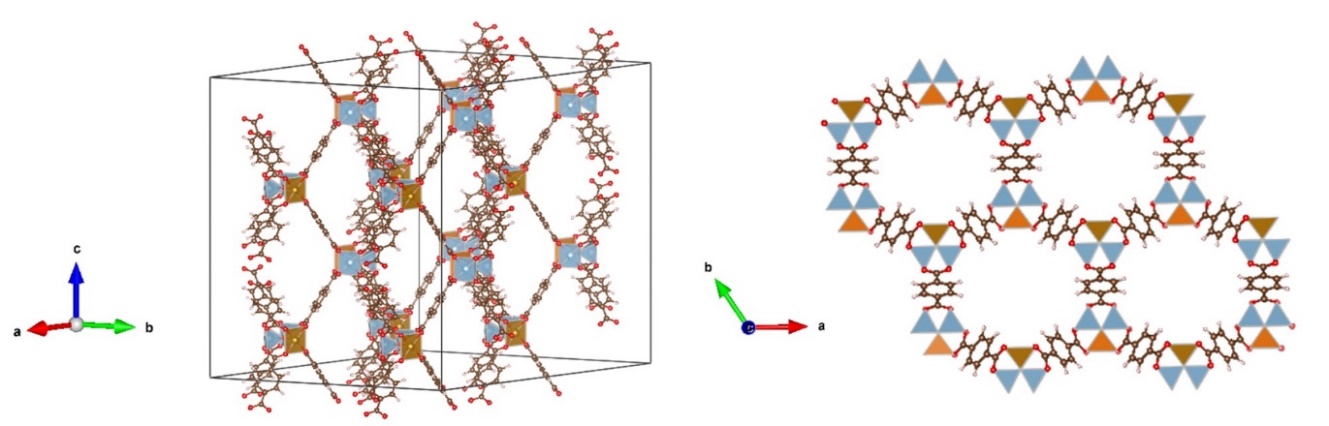


**(b)**

**Figure S1.** (a) Rietveld refinement on the XRD pattern of MIL-88B(Fe) based on the triclinic structure with *P-1* space group, and (b) Predicted crystal structure of MIL-88B(Fe), with goodness of fit (defined by *G* = *χ*2) is found at 1.068.

**S2. EDX Spectrum of MIL-88B(Fe)**


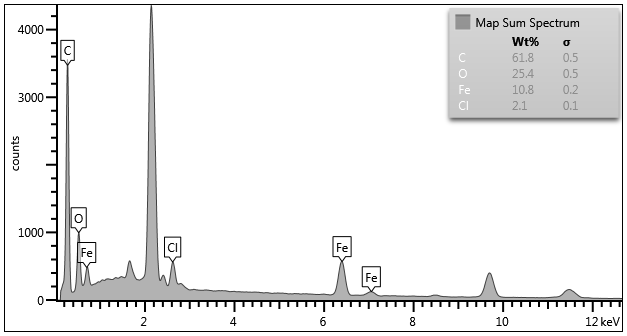


**Figure S2.** EDX spectrum of MIL-88B(Fe) polycrystalline crystals.

**S3. N2 physisorption Graphs**


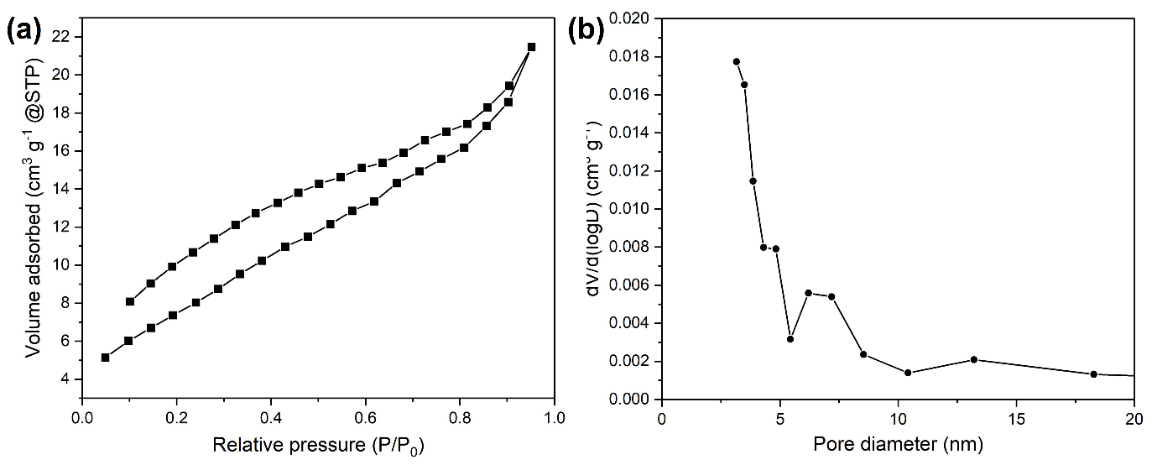


**Figure S3.** N2 physisorption(a) adsorption-desorption isotherm and (b) pore size distribution of MIL-88B(Fe).
